# Supplementary material for: User-Centred Design of a Final Results Report for Participants in Multi-Sensor Personal Air Pollution Exposure Monitoring Campaigns
Source: Preprints.org preprint supplement (doi:10.20944/preprints202110.0031.v1), 2021-10-01
Supplement: Supplementary file 1 [file supplementary]

Archive with 6 entries (6 files):
- S1_Data_analysis.xlsx
- S2-Focus-group-voice-recording-c.mp3
- S3_transcript_and_summary_of_changes.docx
- S4_Focus_group_PPT.pptx
- S5_printed_materials.docx
- S6_Example_report_.pdf
